# Supplementary material for: Persister state-directed transitioning and vulnerability in melanoma
Source: PubMed Central journal article supplement (PMC9160289; doi:10.1038/s41467-022-30641-9), 2022-06-01
Supplement: 41467_2022_30641_MOESM2_ESM.pdf [file 41467_2022_30641_MOESM2_ESM.pdf]

## Description of Additional Supplementary Files

File Name: Supplementary Data 1

Description: Significantly regulated genes detected by mass spectrometry of WM3734 cells treated with 10  $\mu$ M Cpd1 for 72 h. Related to Figure 3.

File Name: Supplementary Data 2

Description: Significantly regulated genes detected by RNAseq of cells treated with Cpd1 (WM3734 and CSM152 cells, 10  $\mu$ M Cpd 1 for 72 h,) or doxycycline (WM3734Tet3G-KDM5B cells, 10 ng/ml for 24 h, 48 h or 72 h). Related to Figure 3, 4 and Supplementary Figure 8.

File Name: Supplementary Data 3

Description: Significantly regulated genes detected by RNAseq of cells treated with Cpd1 (WM3734 and CSM152 cells, 10  $\mu$ M for 12 h, 24 h and 48 h). Related to Supplementary Figure 8.

File Name: Supplementary Movie 1

Description: Live cell imaging of WM3734 cells treated with DMSO as control over 5 days. Related to Figure 3.

File Name: Supplementary Movie 2

Description: Live cell imaging of WM3734 cells treated with 10  $\mu$ M Neg4 as control over 5 days. Related to Figure 3.

File Name: Supplementary Movie 3

Description: Live cell imaging of WM3734 cells treated with 10  $\mu$ M Cpd1 over 5 days. Related to Figure 3.
